# Supplementary material for: Maternal immune activation by toll-like receptor 7 agonist during mid-gestation increases susceptibility to blood-brain barrier leakage after puberty
Source: PubMed Central journal article supplement — Brain Behav Immun Integr. Author manuscript; Available in PMC 2025 Jan 2. (PMC11694724; doi:10.1016/j.bbii.2024.100081), 2024-08-23
Supplement: NIHMS2041531-supplement-1.pdf [file NIHMS2041531-supplement-1.pdf]

A)

**XY data: Correlation of Females**  
**Proximity of GFAP to FITC-labeled blood vessels and leakage**

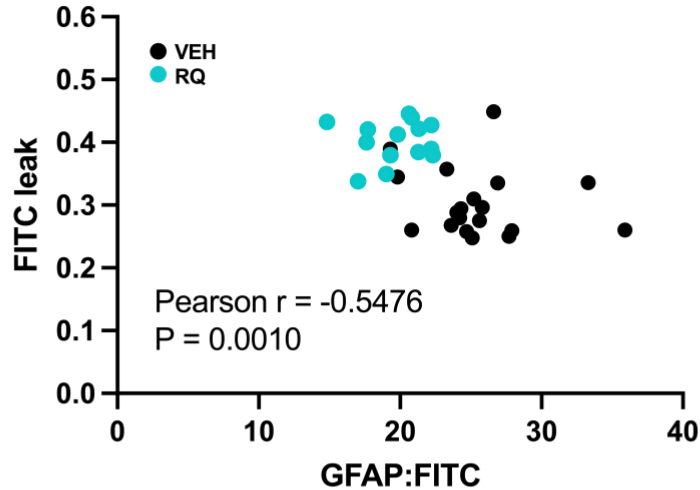

B)

**XY data: Correlation of Males**  
**Proximity of GFAP to FITC-labeled blood vessels and leakage**

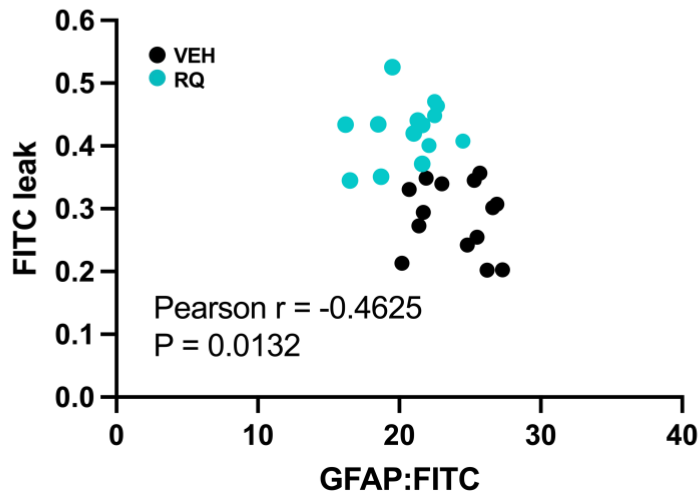

**Supplementary Figure 1. XY Correlation analysis of astrocyte coverage of FITC-labeled blood vessels with FITC leakage.** Lowered astrocyte coverage of blood vessels correlates with greater FITC leakage permeability from blood vessels in the paraventricular nucleus of the hypothalamus across all treatment groups in (A) females and (B) males. Data points include mice from both Vehicle and Resiquimod groups. FITC = Fluorescein Isothiocyanate, GFAP = Glial Fibrillary Acidic Protein, VEH = Vehicle, RQ = Resiquimod. N = 14-18 animals / group.
